# Supplementary figures and images for: Exploiting the weekly cycle as observed over Europe to analyse aerosol indirect effects in two climate models
Source: Copernicus journal article supplement (doi:10.5194/acp-9-8493-2009), 2009-11-09

Observations

HadGEM2

ECHAM5

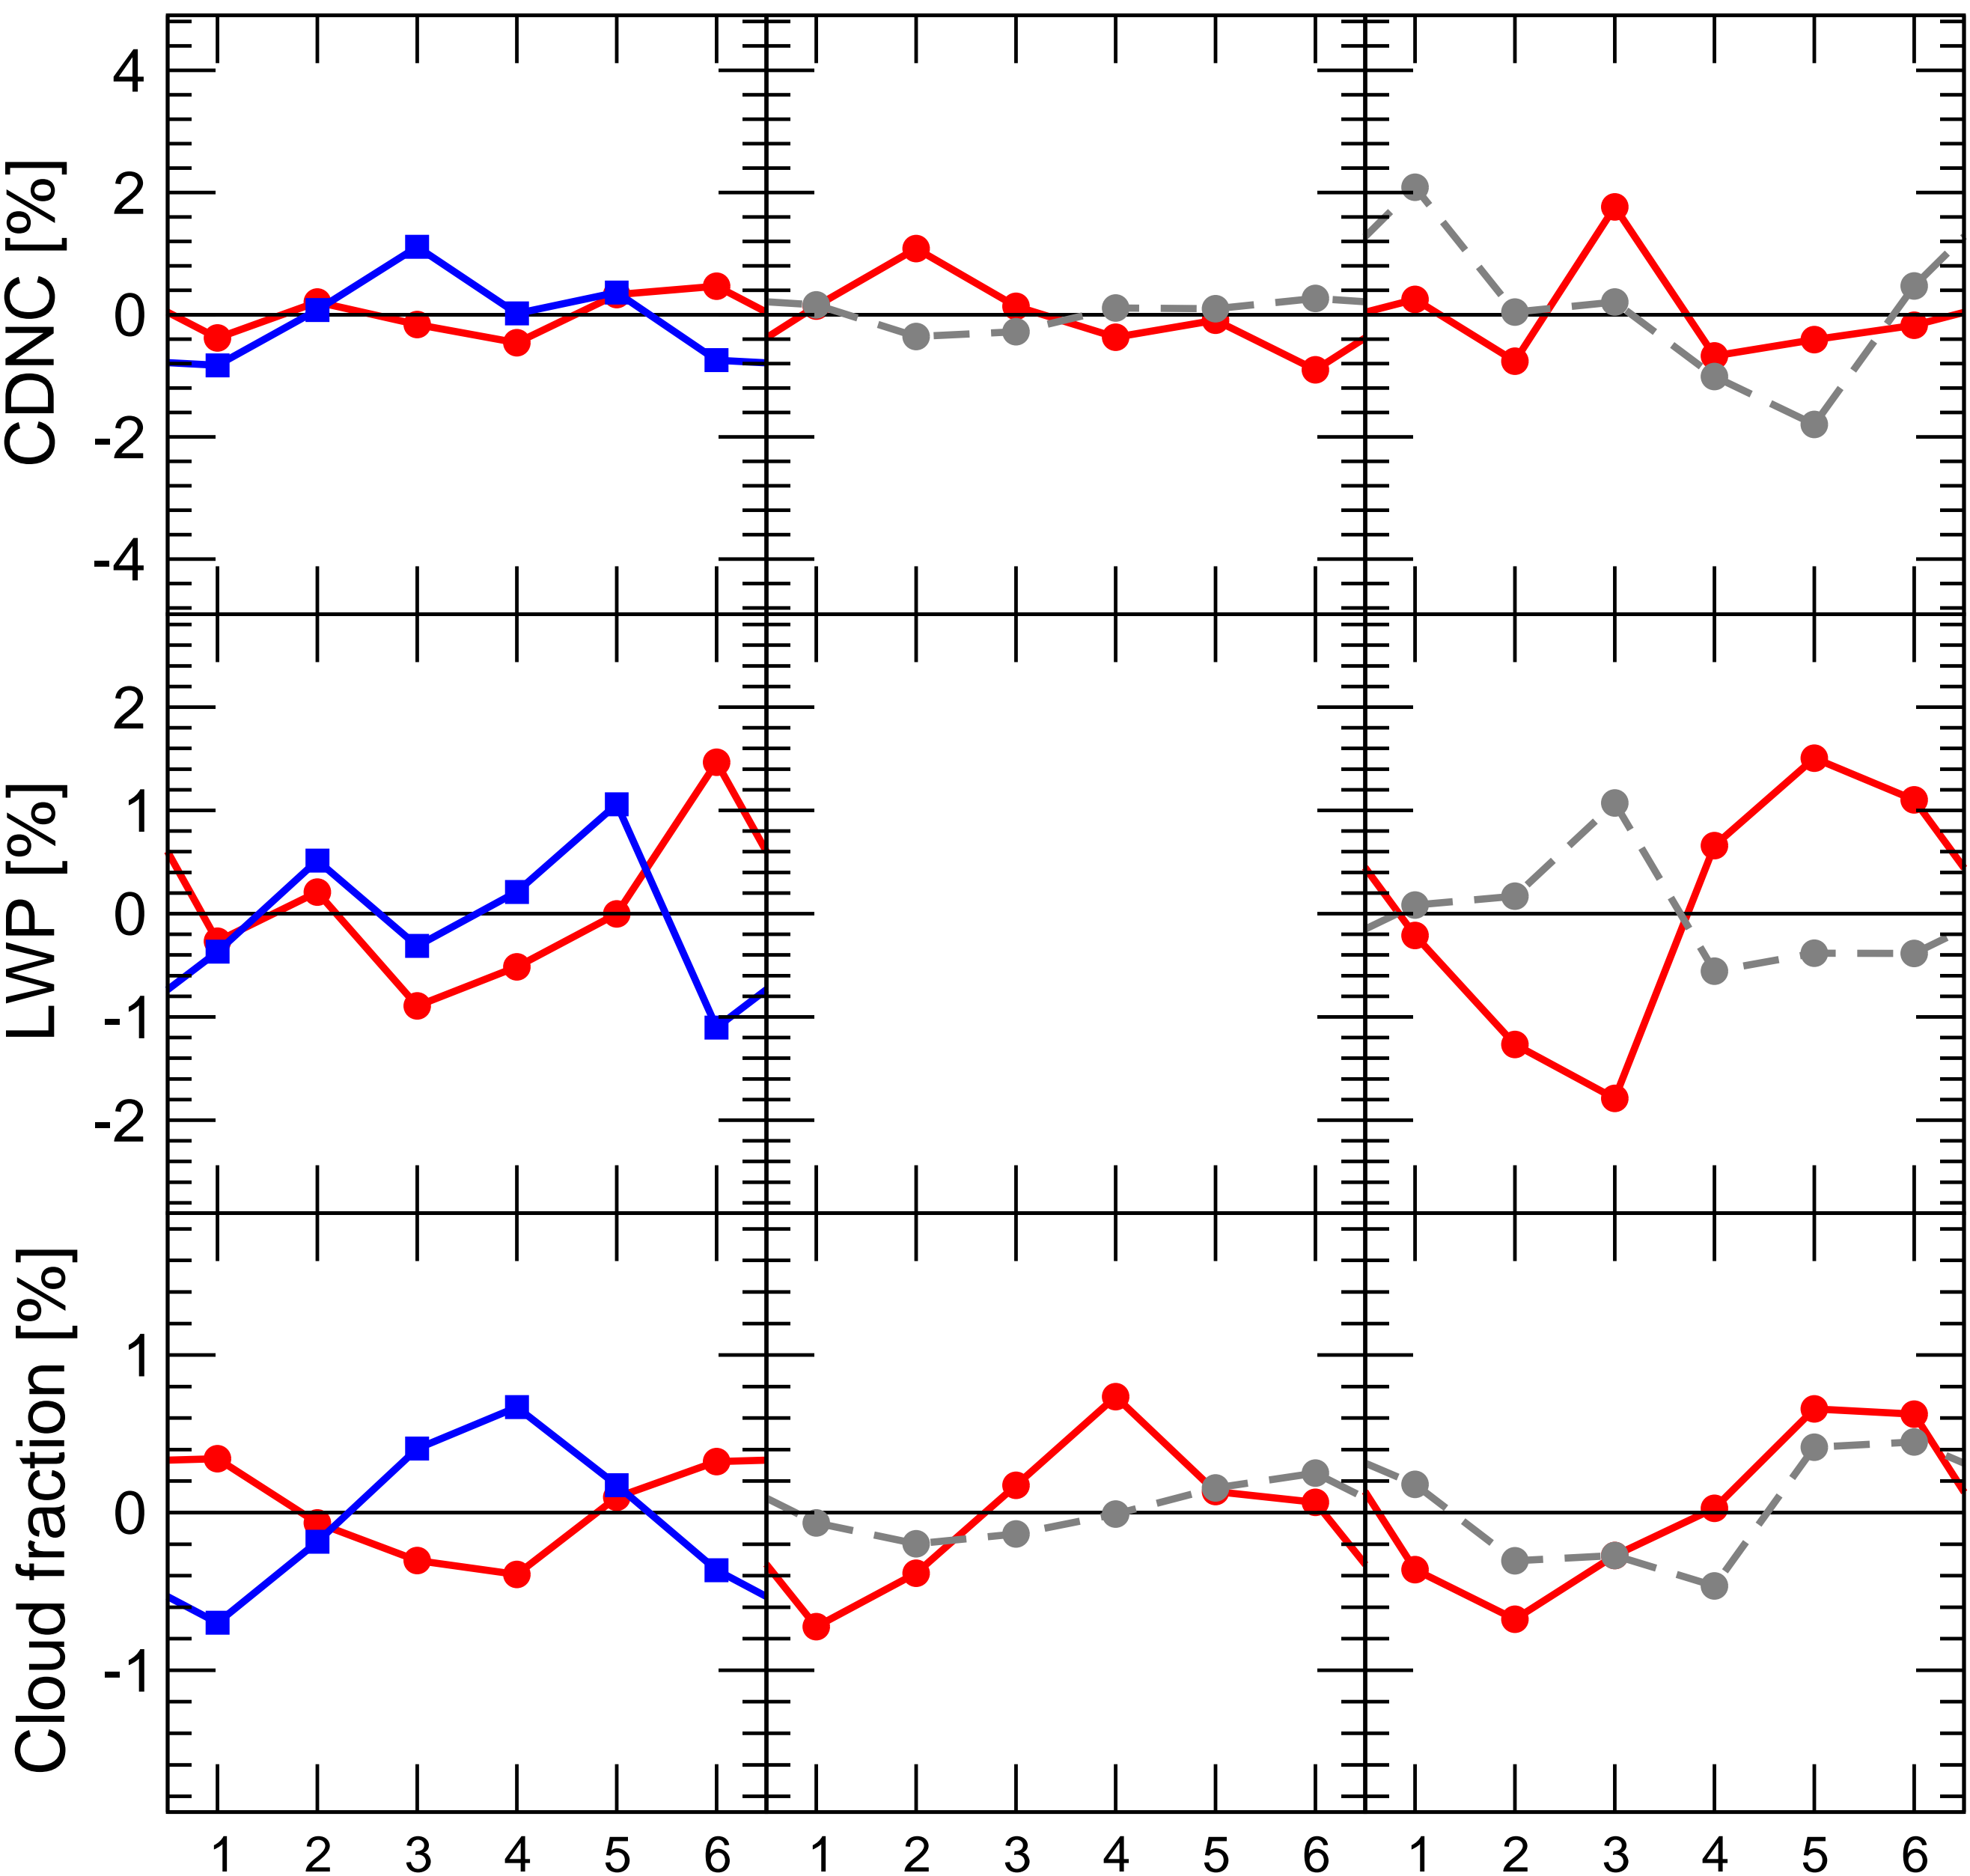

Supplement: Supplementary file 1 [file acp-9-8493-2009-supplement.zip]

Observations

HadGEM2

ECHAM5

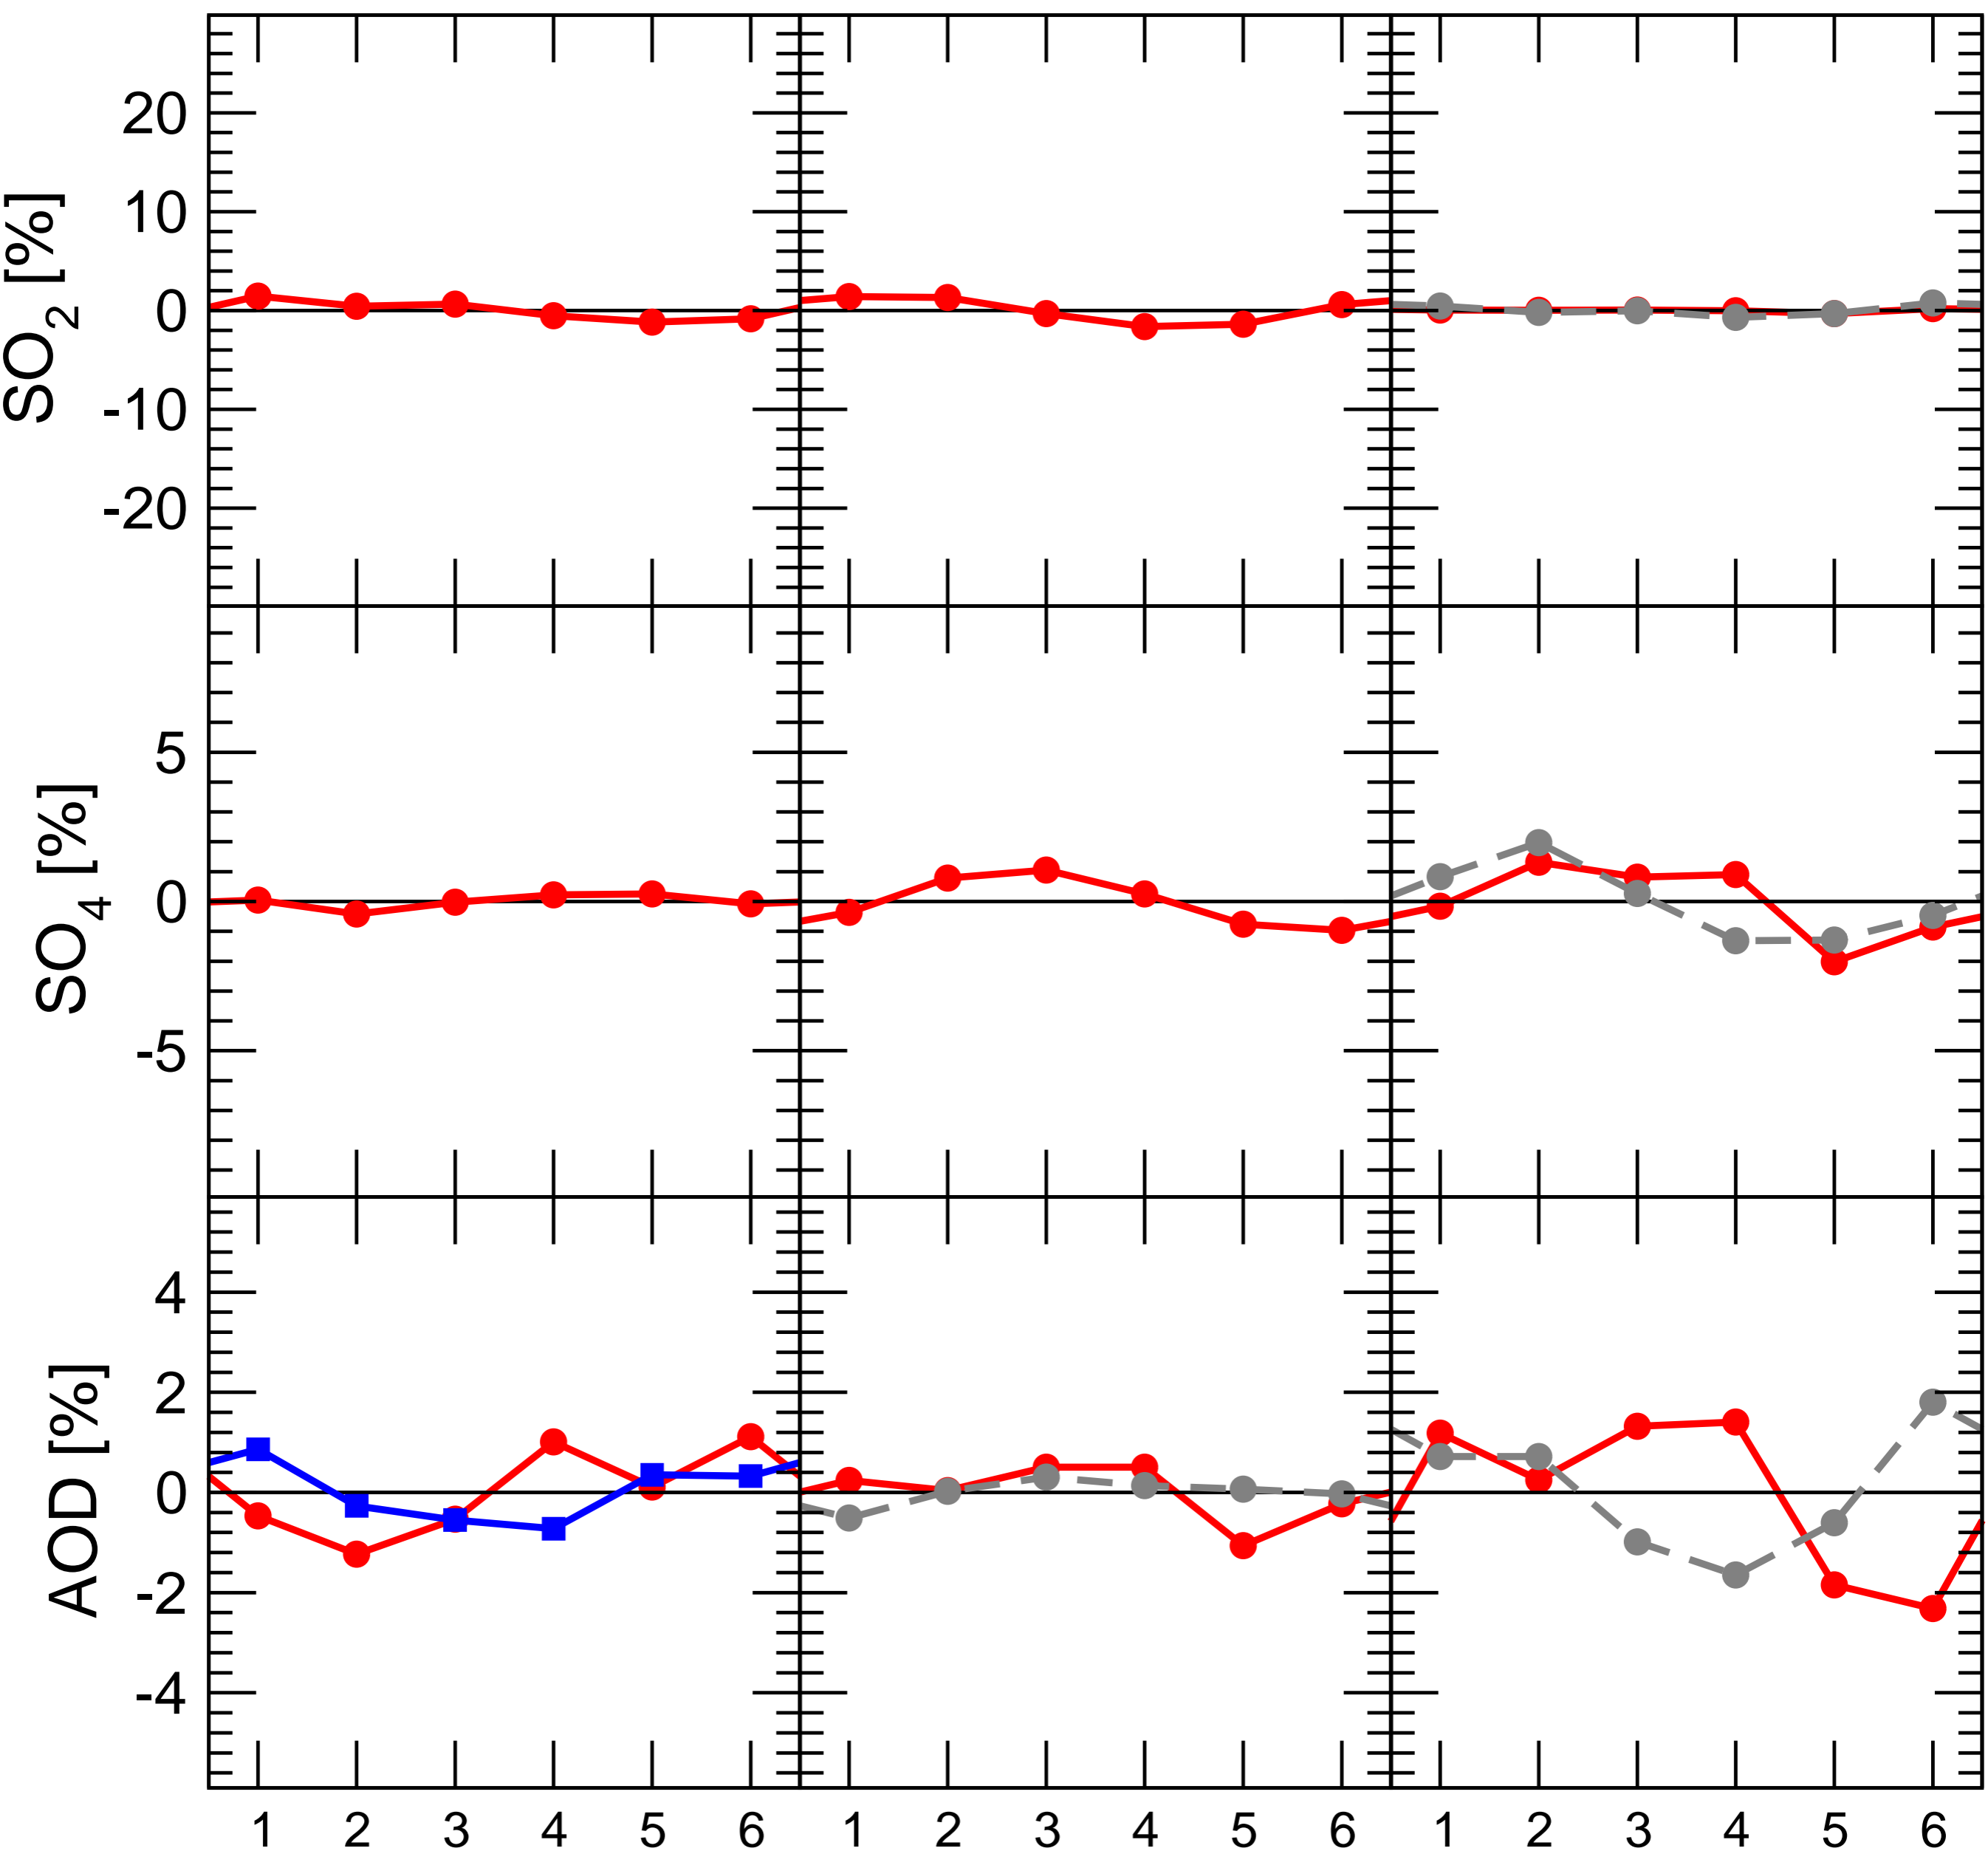

Supplement: Supplementary file 2 [file acp-9-8493-2009-supplement.zip]

Observations

HadGEM2

ECHAM5

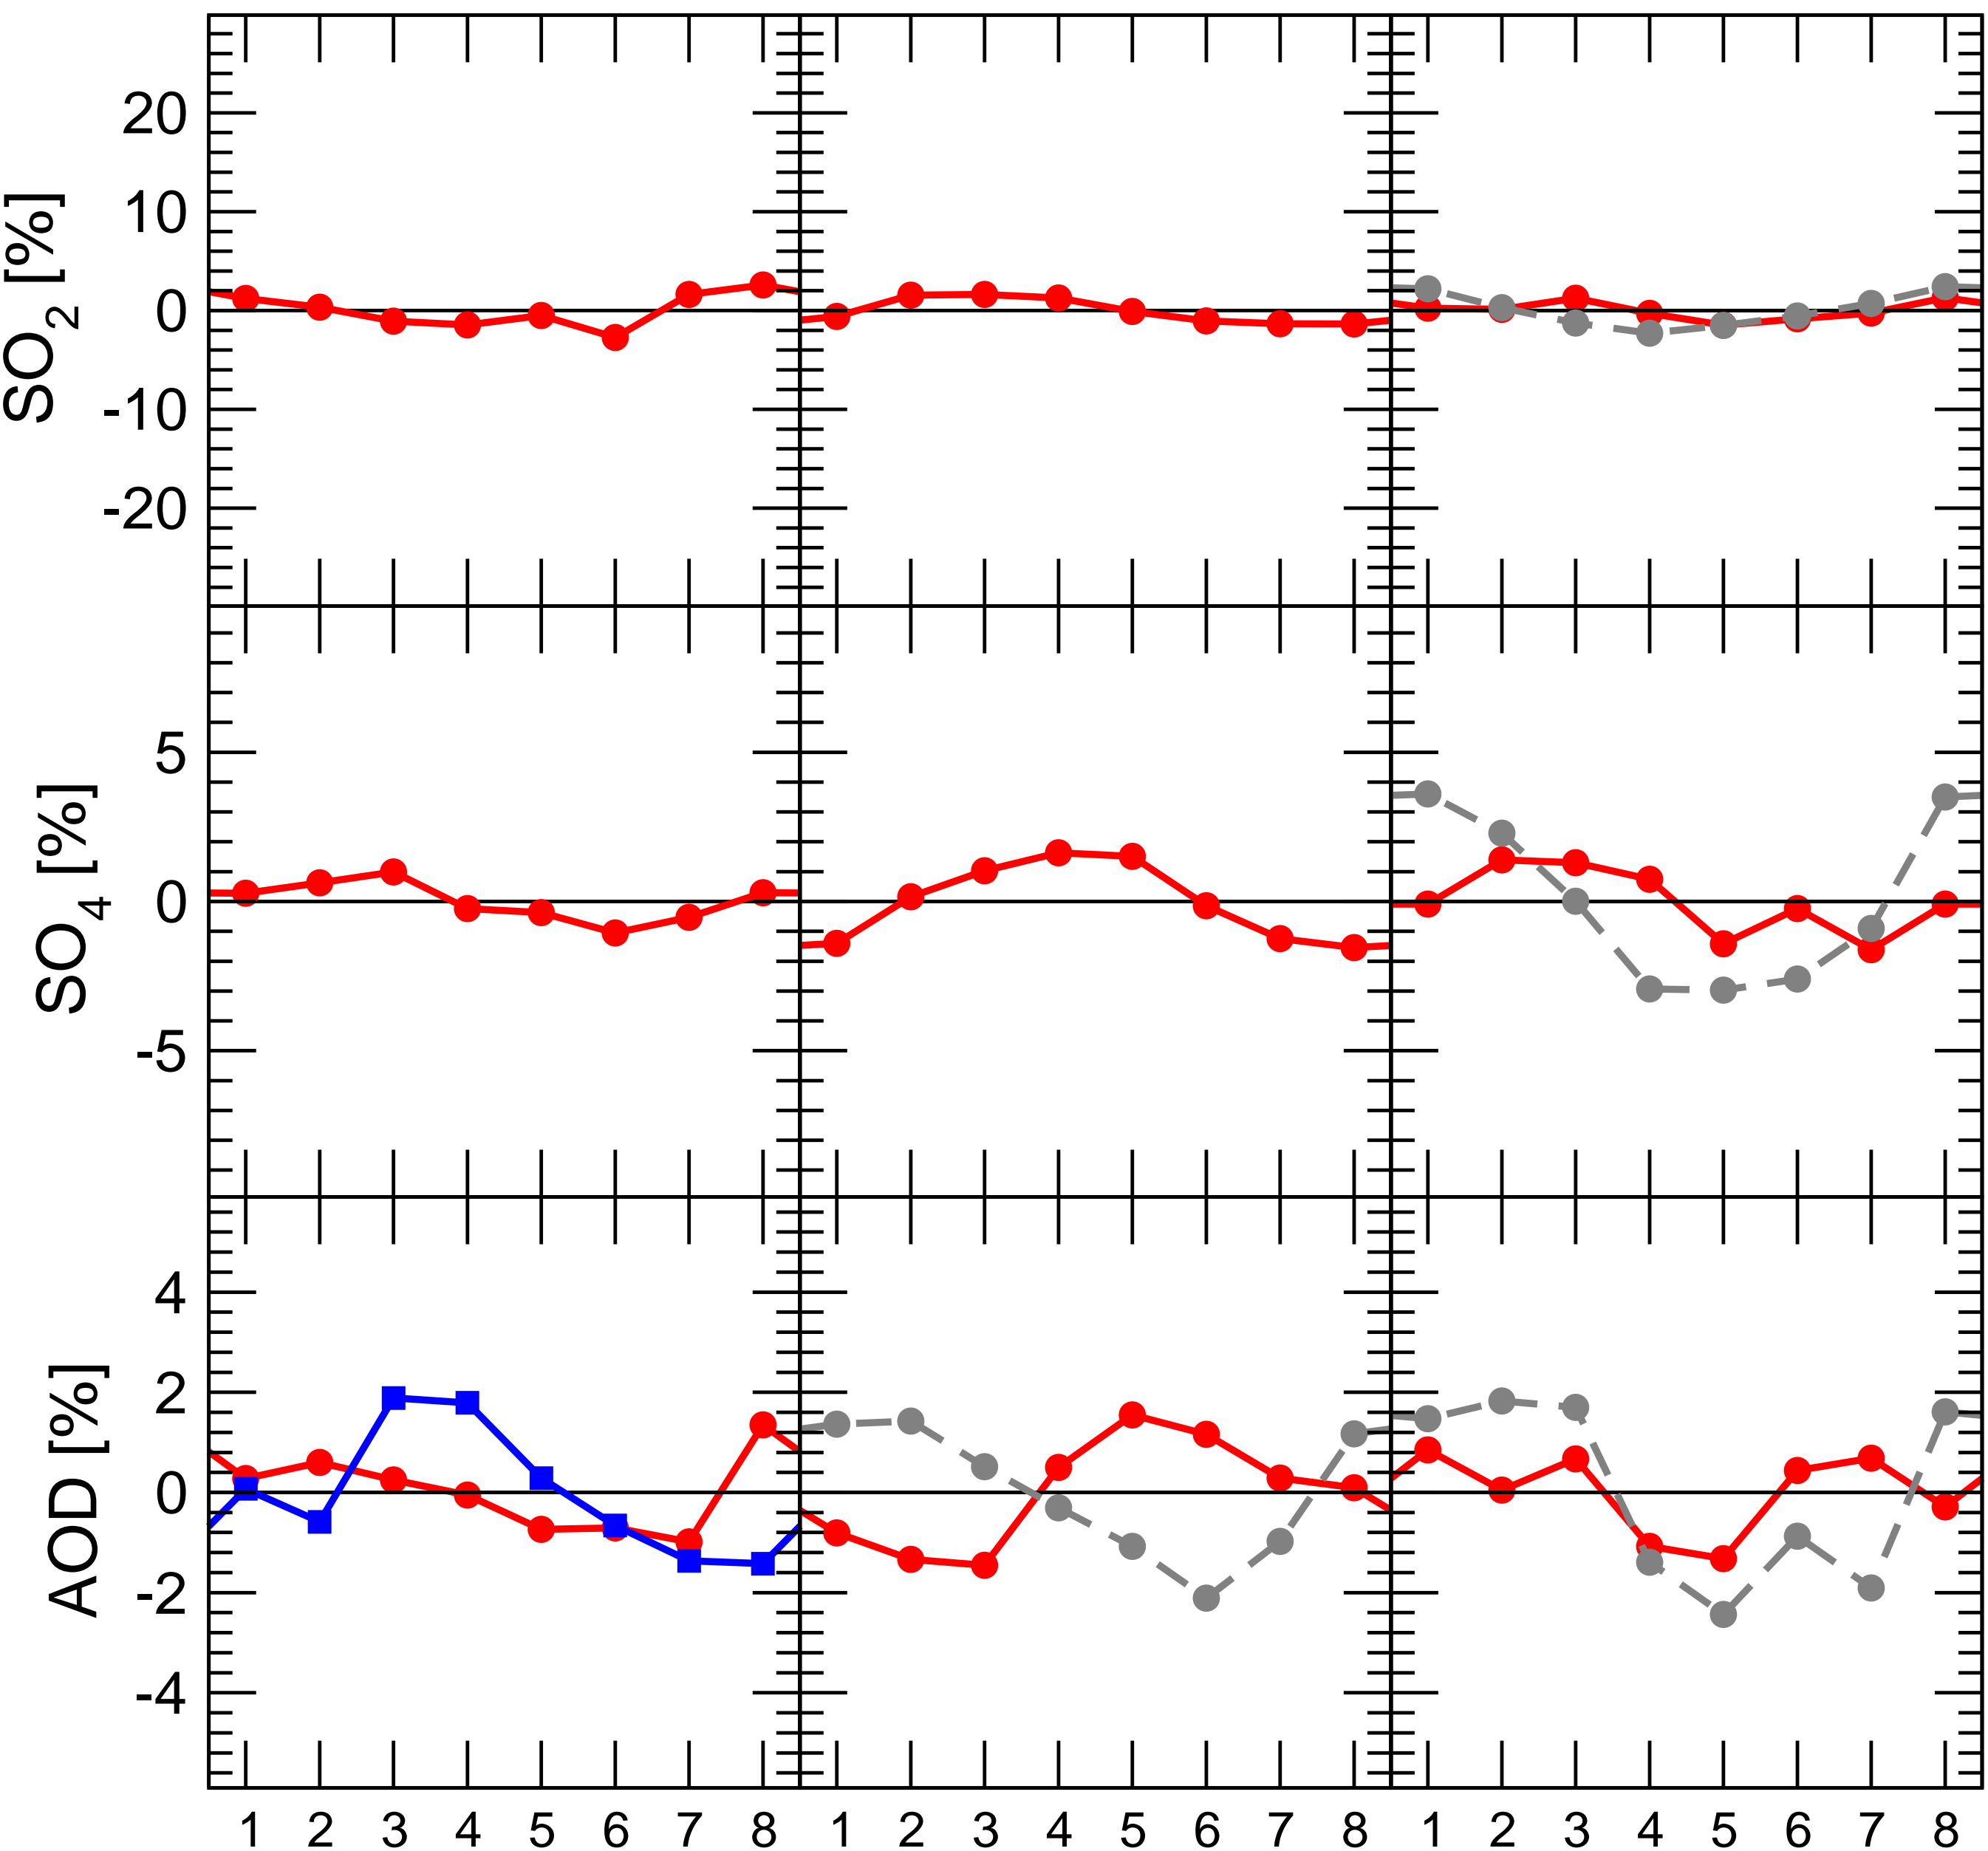

Supplement: Supplementary file 3 [file acp-9-8493-2009-supplement.zip]

Observations

HadGEM2

ECHAM5

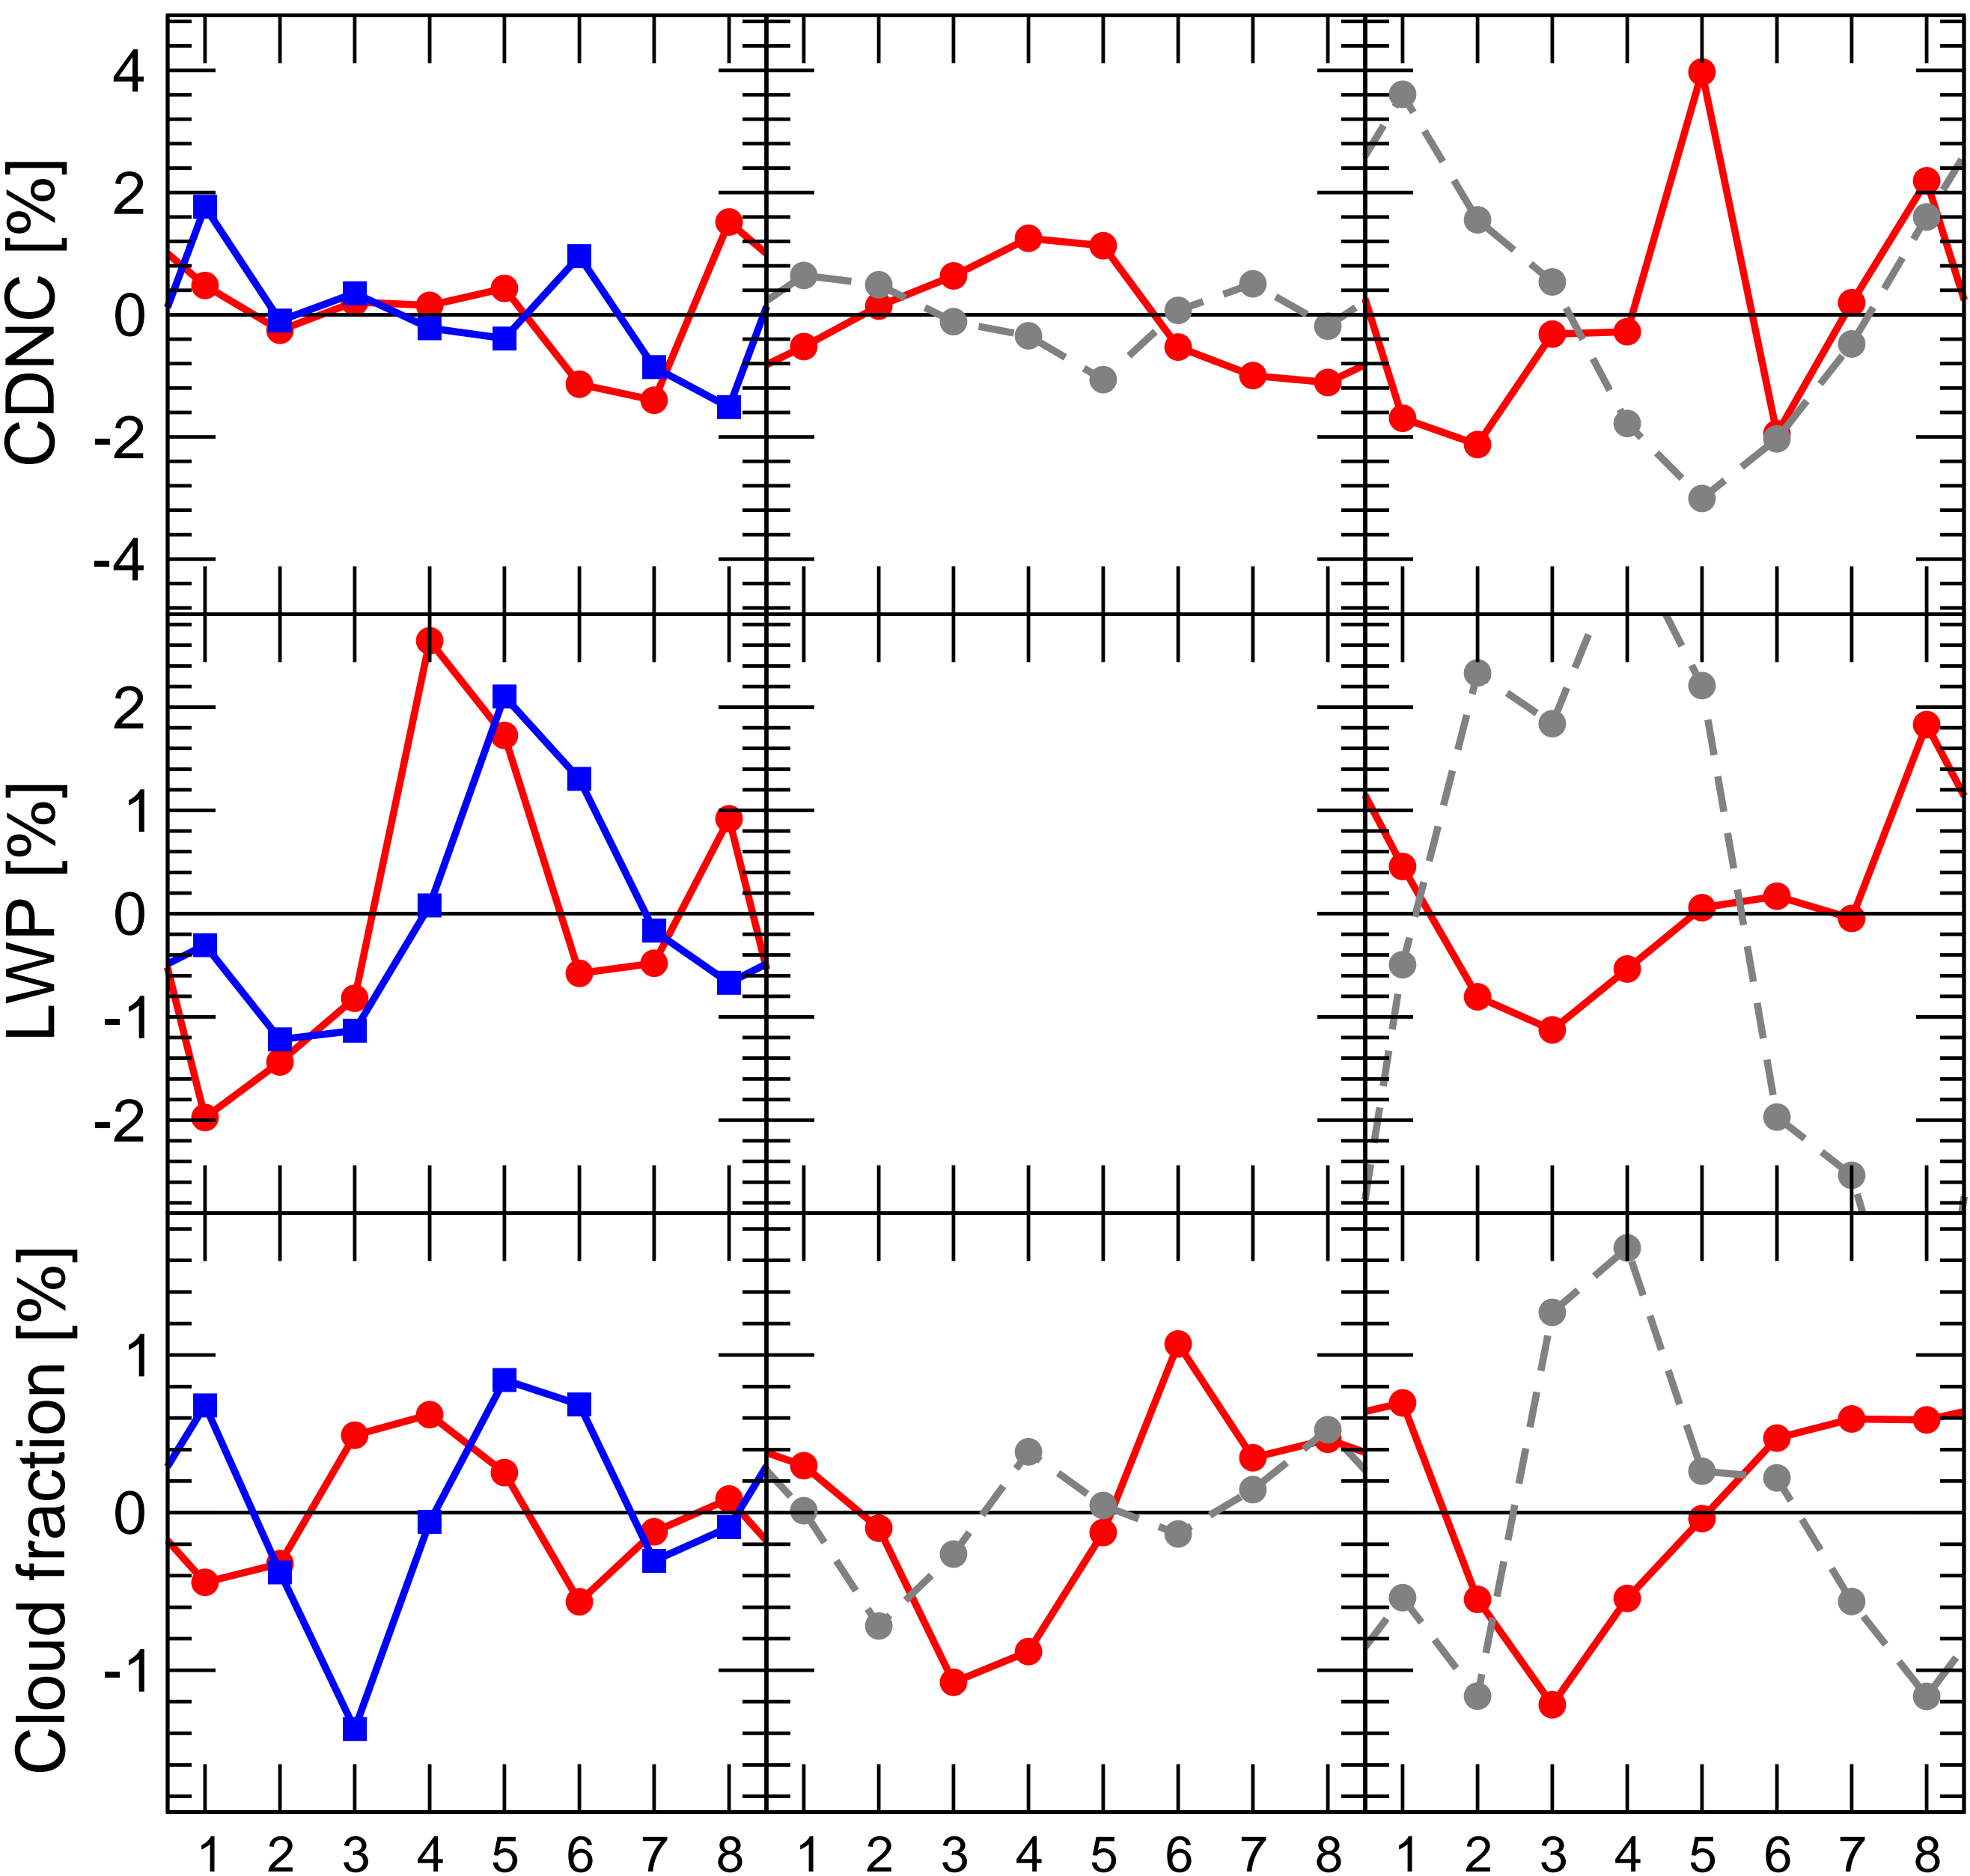

Supplement: Supplementary file 4 [file acp-9-8493-2009-supplement.zip]
